# Supplementary material for: Genomic profiles and their associations with TMB, PD-L1 expression, and immune cell infiltration landscapes in synchronous multiple primary lung cancers
Source: PubMed Central journal article supplement — J Immunother Cancer. 2021 Dec 9;9(12):e003773. doi: 10.1136/jitc-2021-003773 (PMC8663088; doi:10.1136/jitc-2021-003773), 2021-12-09
Supplement: jitc-2021-003773supp001.pdf [file jitc-2021-003773supp001.pdf]

**Table S1. Gene list of the 1021-gene panel**

## 1.1 All 4847 exon regions of 312 genes

|        |        |        |         |         |          |         |          |         |          |
|--------|--------|--------|---------|---------|----------|---------|----------|---------|----------|
| ABL1   | ACVR1B | AKT1   | AKT2    | AKT3    | ALK      | APC     | AR       | ARAF    | ARID1A   |
| ARID1B | ARID2  | ASXL1  | ATM     | ATR     | ATRX     | AURKA   | AURKB    | AXIN1   | AXIN2    |
| AXL    | B2M    | BAP1   | BARD1   | BCL2    | BCL2L1   | BCOR    | BLM      | BMPR1A  | BRAF     |
| BRCA1  | BRCA2  | BRD4   | BRIP1   | BTK     | CARD11   | CASP8   | CBFB     | CBL     | CCND1    |
| CCND2  | CCND3  | CCNE1  | CD274   | CDC73   | CDH1     | CDK12   | CDK4     | CDK6    | CDK8     |
| CDKN1A | CDKN1B | CDKN2A | CDKN2B  | CDKN2C  | CEBPA    | CHEK1   | CHEK2    | CIC     | CREBBP   |
| CRKL   | CSF1R  | CTCF   | CTNNA1  | CTNNB1  | CUL3     | CYLD    | DAXX     | DDR1    | DDR2     |
| DICER1 | DNMT3A | DOT1L  | EGFR    | EIF1AX  | C11orf30 | EP300   | EPAS1    | EPCAM   | EPHA2    |
| EPHA3  | EPHA5  | EPHB1  | EPHB6   | ERBB2   | ERBB3    | ERBB4   | ERCC1    | ERCC3   | ERCC4    |
| ERCC5  | ERG    | ERF1   | ESR1    | EXT1    | EXT2     | EZH2    | FAM123B  | FAM175A | FANCA    |
| FANCC  | FANCD2 | FANCE  | FANCF   | FANCG   | FANCL    | FANCM   | FAS      | FAT1    | FAT2     |
| FBXW7  | FGF19  | FGF3   | FGF4    | FGFR1   | FGFR2    | FGFR3   | FGFR4    | FH      | FLCN     |
| FLT1   | FLT3   | FLT4   | FOXA1   | FOXL2   | FOXP1    | FUBP1   | GALNT12  | GATA3   | GNA11    |
| GNAQ   | GNAS   | GRIN2A | GRM3    | HDAC1   | HGF      | HNF1A   | HOXB13   | HRAS    | IDH1     |
| IDH2   | IFNG   | IFNGR1 | IGF1R   | IKBKE   | IKZF1    | IL7R    | INPP4B   | IRF2    | IRS2     |
| JAK1   | JAK2   | JAK3   | JUN     | KDM5A   | KDM5C    | KDM6A   | KDR      | KEAP1   | KIT      |
| KRAS   | LRP1B  | MAF    | MAP2K1  | MAP2K2  | MAP2K4   | MAP3K1  | MAPK1    | MAX     | MCL1     |
| MDM2   | MDM4   | MED12  | MEF2B   | MEN1    | MET      | MITF    | MLH1     | MLH3    | MLL      |
| MLL2   | MLL3   | MPL    | MRE11A  | MS4A1   | MSH2     | MSH3    | MSH6     | MST1R   | MTOR     |
| MUTYH  | MYC    | MYCL1  | MYCN    | MYD88   | NBN      | NCOR1   | NF1      | NF2     | NFE2L2   |
| NFKBIA | NKX2-1 | NOTCH1 | NOTCH2  | NOTCH3  | NPM1     | NRAS    | NSD1     | NTHL1   | NTRK1    |
| NTRK2  | NTRK3  | PALB2  | PARK2   | PARP1   | PAX5     | PBRM1   | PCK1     | PDCD1   | PDCD1LG2 |
| PDGFRA | PDGFRB | PKD1   | PIK3CA  | PIK3CB  | PIK3CG   | PIK3R1  | PIK3R2   | PMS1    | PMS2     |
| POLD1  | POLE   | POT1   | PPP2R1A | PRDM1   | PRKAR1A  | PTCH1   | PTCH2    | PTEN    | PTPN11   |
| PTPRD  | RAC1   | RAD50  | RAD51   | RAD51B  | RAD51C   | RAD51D  | RAD52    | RAD54L  | RAF1     |
| RARA   | RB1    | RBM10  | RECQL   | RECQL4  | RET      | RHOA    | RICTOR   | RINT1   | RNF43    |
| ROS1   | RPTOR  | RUNX1  | SDHA    | SDHAF2  | SDHB     | SDHC    | SDHD     | SERPIN3 | SERPIN4  |
| SETD2  | SF3B1  | SLX4   | SMAD2   | SMAD3   | SMAD4    | SMARCA4 | SMARCB1  | SMO     | SOCS1    |
| SOX2   | SOX9   | SPOP   | SRC     | STAG2   | STAT3    | STK11   | SUFU     | SYK     | TBX3     |
| TCF7L2 | TERC   | TET2   | TGFBR2  | TMEM127 | TMPRSS2  | TNFAIP3 | TNFRSF14 | TOP1    | TOP2A    |
| TP53   | TSC1   | TSC2   | TSHR    | U2AF1   | VEGFA    | VHL     | WRN      | WT1     | XPO1     |
| XRCC2  | ZMAT3  |        |         |         |          |         |          |         |          |

## 1.2 Introns, promoter, or fusion breakpoint area of 38 genes

|       |        |         |       |       |         |        |      |      |      |
|-------|--------|---------|-------|-------|---------|--------|------|------|------|
| ALK   | BCL2L1 | BRAF    | BRCA1 | BRD4  | CD74    | EGFR   | EML4 | ERG  | ETV6 |
| EZR   | FGFR1  | FGFR2   | FGFR3 | KIF5B | KIT     | MAML2  | MET  | MSH2 | MYC  |
| MYCL1 | NCOA4  | NOTCH2  | NTRK1 | NTRK2 | NTRK3   | PDGFRA | RAF1 | RET  | ROS1 |
| RSPO2 | SDC4   | SLC34A2 | TERT  | TFE3  | TMPRSS2 | TPM3   | PMS2 |      |      |

## 1.3 A total of 1778 selected coding regions of 709 genes

|           |           |           |           |           |           |          |          |           |          |
|-----------|-----------|-----------|-----------|-----------|-----------|----------|----------|-----------|----------|
| ABCA13    | ABCB1     | ABCC1     | ABCC11    | ABCC2     | ABCG2     | ABL2     | ACACA    | ACIN1     | ACTB     |
| ACTG1     | ACTG2     | ACVR2A    | ACVRL1    | ADAM29    | ADAMTS5   | ADCY1    | AFF1     | AFF2      | AFF3     |
| AHNAK     | AKAP9     | ALB       | AMOT      | ANGPT1    | ANK3      | ANKRD11  | ANKRD30A | ANKRD30B  | APEX1    |
| APOBEC3B  | ARAP3     | ARFGEF1   | ARFGEF2   | ARHGAP29  | ARHGAP35  | ARID4B   | ARID5B   | ARNT      | ASCL4    |
| ASH1L     | ASMTL     | ASPM      | ASTN1     | ASXL2     | ATIC      | ATP11B   | ATP12A   | ATP1A1    | ATP2B3   |
| BAZ2B     | BBC3      | BBS9      | BCAS1     | BCL10     | BCL11A    | BCL11B   | BCL2A1   | BCL2L11   | BCL3     |
| BCL6      | BCL9      | BCORL1    | BCR       | BIRC3     | BMPR2     | BNC2     | BPTF     | BRD2      | BRD3     |
| BRSK1     | BRWD1     | BTLA      | BUB1      | C15orf23  | C15orf55  | C1QA     | C1S      | C3orf70   | C7orf53  |
| C8orf34   | CACNA1E   | CADM2     | CALR      | CAMTA1    | CASP1     | CASQ2    | CBLB     | CBR1      | CBR3     |
| CCDC168   | CCNA1     | CCNB3     | CCT3      | CCT5      | CCT6B     | CD22     | CD33     | CD5L      | CD74     |
| CDA       | CDH11     | CDH18     | CDH23     | CDK13     | CHD1      | CHD1L    | CHD4     | CHD6      | CHD8     |
| CHD9      | CHFR      | CHI3L1    | CHN1      | CHTA      | CLDN18    | CLP1     | CLSPN    | CLTC      | CNOT3    |
| CNOT4     | CNTN1     | CNTN5     | CNTNAP1   | CNTNAP5   | COL1A1    | COL2A1   | COL5A1   | COL5A2    | COL5A3   |
| COPS2     | CPS1      | CRIPAK    | CRLF2     | CRNKL1    | CRTC1     | CSF1     | CSF3R    | CSMD1     | CSMD3    |
| CSNK1A1   | CSNK1G3   | CTLA4     | CTNNA2    | CTNND1    | CUX1      | CXCR4    | CYBA     | CYP19A1   | CYP1A1   |
| CYP1B1    | CYP2A13   | CYP2C8    | CYP2D6    | CYP3A4    | CYP3A5    | DCC      | DDX3X    | DDX5      | DEK      |
| DHX35     | DHX9      | DIAPH1    | DIS3L2    | DLC1      | DMD       | DNAH6    | DNAJB1   | DNM2      | DNMT1    |
| DNMT3B    | DOCK2     | DOCK7     | DPYD      | DRGX      | DTX1      | DUSP22   | DYSF     | E2F3      | EBF1     |
| ECT2L     | EED       | EEF1A1    | EGFL7     | EGR3      | EIF2AK3   | EIF2C3   | EIF3A    | EIF4A2    | EIF4G3   |
| ELAC2     | ELF1      | ELF3      | ELMO1     | ELN       | EME2      | EMID2    | EML4     | EPC1      | EPHA1    |
| EPHA4     | EPHA7     | EPHB2     | EPHB4     | EPOR      | EPPK1     | EPS15    | ERBB2IP  | ERCC2     | ESR2     |
| ETS1      | ETV1      | ETV5      | ETV6      | EWSR1     | EZR       | F8       | FAM131B  | FAM135B   | FAM157B  |
| FAM46C    | FAM5C     | FAP       | FASLG     | FAT3      | FAT4      | FCGR1A   | FCGR2A   | FCGR2B    | FCGR3A   |
| FCRL4     | FGF10     | FGF12     | FGF14     | FGF23     | FGF6      | FLG      | FLI1     | FLNC      | FMN2     |
| FN1       | FNDC4     | FOXA2     | FOXO1     | FOXO3     | FOXQ1     | FRMPD4   | FUS      | FXR1      | FYN      |
| FZD1      | G3BP1     | G3BP2     | GAB2      | GABRA6    | GATA1     | GATA2    | GFRAL    | GIGYF1    | GKN2     |
| GLB1L3    | GLI1      | GLI2      | GLI3      | GMPS      | GNA13     | GNG2     | GPC3     | GPR124    | GPS2     |
| GPX1      | GRB7      | GSK3B     | GSTM5     | GSTP1     | GUSB      | H3F3A    | H3F3B    | H3F3C     | HCLS1    |
| HCN1      | HDAC4     | HDAC9     | HECW1     | HEY1      | HIST1H1C  | HIST1H1D | HIST1H1E | HIST1H2AC | HIST1H2G |
| HIST1H2AL | HIST1H2AM | HIST1H2BC | HIST1H2BD | HIST1H2BJ | HIST1H2BK | HIST1H2O | HIST1H3B | HIST1H3C  | HIST1H3D |
| HIST1H3F  | HIST1H3G  | HIST1H3H  | HIST1H3I  | HIST1H4I  | HIST3H3   | HLA-A    | HLA-B    | HLA-C     | HLF      |
| HMCN1     | HNFB      | HNRPDL    | HOXA11    | HOXA13    | HOXA3     | HOXA9    | HOXC13   | HOXD11    | HOXD13   |
| HSD3B1    | HSP90AA1  | HSP90AB1  | HSPA8     | HSPD1     | HSPH1     | ICK      | ICOSLG   | ID3       | IFTM3    |
| IGF1      | IGF2      | IGF2R     | IGLL5     | IKZF2     | IKZF3     | IL10     | IL1RAPL1 | IL21R     | IL6      |
| IL6ST     | IMPG1     | ING1      | INHBA     | INPP4A    | INPPL1    | INSR     | IRF4     | IRF6      | IRS1     |
| ITGB3     | ITK       | ITSN1     | JARID2    | KALRN     | KAT6A     | KAT6B    | KCNJ5    | KCNQ2     | KDM2B    |
| KEL       | KIF5B     | KLF4      | KLHL6     | KLK1      | KRTAP5-5  | L3MBTL1  | LAMA2    | LATS1     | LATS2    |
| LCP1      | LEF1      | LGALS8    | LIFR      | LPHN2     | LPP       | LRP2     | LRP4     | LRP5      | LRP6     |
| LRRC7     | LRRK2     | LYN       | LZTS1     | MACF1     | MAD1L1    | MAGI2    | MAML2    | MAML3     | MAP3K13  |
| MAPK3     | MCC       | MCM3      | MDC1      | MECOM     | MEF2C     | MGA      | MIB1     | MIOS      | MKL1     |
| MLL4      | MLLT3     | MMP11     | MMP2      | MN1       | MNDA      | MNX1     | MSH4     | MSN       | MSR1     |
| MTHFR     | MTRR      | MUC5B     | MYH11     | MYH14     | MYH9      | MYO3A    | MYOD1    | NAP1L1    | NAV3     |

|          |          |         |         |          |         |         |         |           |         |
|----------|----------|---------|---------|----------|---------|---------|---------|-----------|---------|
| NCAM2    | NCF2     | NCF4    | NCK1    | NCOA3    | NCOA4   | NCOR2   | NCSTN   | NDUFA13   | NFATC4  |
| NFE2L3   | NKX3-1   | NLRC3   | NOD1    | NOS3     | NOTCH4  | NQO1    | NR1H2   | NR2F2     | NR4A2   |
| NRG1     | NRP2     | NRXN1   | NTM     | NUMA1    | NUP107  | NUP210  | NUP93   | NUP98     | OBSCN   |
| OGDH     | OMD      | OPCML   | OR11G2  | OR2T4    | OR4A15  | OR4C6   | OR5L2   | OR6F1     | P2RY8   |
| P4HB     | PABPC1   | PABPC3  | PAG1    | PAK1     | PAK3    | PASK    | PAX3    | PAX7      | PC      |
| PCDH18   | PCSK6    | PCSK7   | PDCD11  | PDE4DIP  | PDGFB   | PDILT   | PER1    | PGR       | PHF1    |
| PHF6     | PIK3C2A  | PIK3C2B | PIK3C2G | PIK3C3   | PIM1    | PKD1L2  | PKHD1   | PLAG1     | PLCB1   |
| PLCG1    | PLCG2    | PLK1    | PLXNA1  | PLXNB2   | PNRC1   | POLQ    | POM121  | POM121L12 | POU2AF1 |
| PPM1D    | PPP1R17  | PPP6C   | PRDM16  | PREX2    | PRF1    | PRKAA1  | PRKCB   | PRKCI     | PRKDC   |
| PRRX1    | PRX      | PSG2    | PSIP1   | PSMB1    | PSMB5   | PTGS1   | PTGS2   | PTPN13    | PTPN2   |
| PTPRB    | PTPRK    | PTPRO   | PTPRS   | PTPRT    | PTPRU   | RAB35   | RAC2    | RAD21     | RAD54B  |
| RANBP2   | RASA1    | RASGRP1 | RBL1    | REL      | RELN    | RFC1    | RGS3    | RHEB      | RHOH    |
| RHOT1    | RIT1     | RNASEL  | ROBO1   | ROBO2    | ROBO3   | ROCK1   | RPGR    | RPS6KB1   | RPS6KB2 |
| RSPO2    | RSPO3    | RUNX1T1 | RUNX2   | RXRA     | RYR1    | RYR2    | SBDS    | SCUBE2    | SDC4    |
| SEC31A   | SEMA3A   | SEMA3E  | SEMA6A  | SERPINA7 | SETBP1  | SETDB1  | SF1     | SF3A1     | SFPQ    |
| SGCZ     | SGK1     | SH2B3   | SH2D1A  | SH3PXD2A | SHH     | SI      | SIN3A   | SLC16A1   | SLC1A2  |
| SLC22A16 | SLC22A18 | SLC22A2 | SLC22A3 | SLC34A2  | SLCO1B3 | SLIT1   | SLIT2   | SMARCD1   | SMARCE1 |
| SMC1A    | SMC1B    | SNCAIP  | SNTG1   | SNX29    | SOD2    | SOS1    | SOX10   | SOX17     | SPEN    |
| SPRR3    | SPSB4    | SPTA1   | SRD5A2  | SRGAP1   | SRGAP3  | SRSF2   | SRSF7   | STAG1     | STAT1   |
| SUCLG1   | SUCLG2   | SULT1A1 | SUZ12   | SVEP1    | SYNCRIP | SYNE1   | TAF1    | TAF15     | TAF1L   |
| TAL1     | TBL1XR1  | TBX15   | TBX22   | TCEB1    | TCF12   | TCF3    | TCF4    | TCL1A     | TEC     |
| TENM3    | TERT     | TET1    | TFDP1   | TFDP2    | TFE3    | TGFBF1  | THBS2   | TJP1      | TLE1    |
| TLL2     | TLR4     | TLX3    | TMEM13D | TNFSF11  | TNN     | TP53BP1 | TP63    | TP73      | TPM3    |
| TPR      | TRAF2    | TRAF7   | TRIM24  | TRIM58   | TRIO    | TRPC5   | TRRAP   | TSHZ2     | TSHZ3   |
| TTF1     | TUBA3C   | TUBB3   | TUSC3   | TXNIP    | TYMS    | TYR     | UBE2D2  | UBR5      | UGT1A1  |
| UMPS     | UPF3B    | USH2A   | USP6    | USP8     | VEZF1   | VIM     | VTCN1   | WASF3     | WDR90   |
| WDTC1    | WHSC1    | WHSC1L1 | WIPF1   | WNK1     | WNT5A   | WSCD2   | WVVOX   | WWP1      | WWP2    |
| XIAP     | XPC      | XRCC1   | XRCC3   | YAP1     | YY1AP1  | ZBTB16  | ZC3H11A | ZFH3      | ZFP36L1 |
| ZFP36L2  | ZFPM2    | ZIC3    | ZNF217  | ZNF384   | ZNF521  | ZNF638  | ZNF750  | ZNF804B   |         |

**Table S2 Putative driver genes shared among multiple lesions in 61 MPLCs patients**

| Genes  | Shared mutation patterns                                                   | Numbers of patients |
|--------|----------------------------------------------------------------------------|---------------------|
| EGFR   | L858R, 19del, L861Q, S768I, G719A, T790M, 19indel, 20ins, 20indel, 18indel | 45                  |
| ERBB2  | 20ins, exon17 V659E, exon19 L755P                                          | 6                   |
| KRAS   | G12C, Q61H, G12R, G12F, G12V                                               | 5                   |
| BRAF   | K601E, G469A, L597R, N581S, D594H, E586K, T599dup, S37L                    | 6                   |
| MAP2K1 | Q58_E62del, E41_F53del, E102_I103del                                       | 1                   |

Note: Two patients shared two kinds of mutated driver genes among multiple lesions, this is, EGFR and ERBB2 mutations; EGFR and KRAS mutations.

**Table S3 Clinicopathological characteristics according to shared mutated genes**

| Characteristics   | Different mutant gene, n (%) | Same mutant gene, n (%) | P value       | Characteristics | Different mutant gene, n (%) | Same mutant gene, n (%) | P value       |
|-------------------|------------------------------|-------------------------|---------------|-----------------|------------------------------|-------------------------|---------------|
| Sex               |                              |                         | 0.477         | Lobes of tumor  |                              |                         | 0.659         |
| female            | 12 (40.0)                    | 18 (60.0)               |               | Upper lobe      | 66 (44.3)                    | 83 (55.7)               |               |
| male              | 39 (47.6)                    | 43 (52.4)               |               | Middle lobe     | 7 (36.8)                     | 12 (63.2)               |               |
| Age               |                              |                         | 0.370         | Lower lobe      | 34 (39.1)                    | 53 (60.9)               |               |
| <60               | 39 (48.1)                    | 42 (51.9)               |               | Radiology       |                              |                         | 0.817         |
| ≥60               | 12 (38.7)                    | 19 (61.3)               |               | GGO             | 95 (42.2)                    | 130 (57.8)              |               |
| Smoking           |                              |                         | 0.522         | Solid           | 12 (40.0)                    | 18 (60.0)               |               |
| no                | 44 (44.4)                    | 55 (55.6)               |               | Histopathology  |                              |                         | 0.426         |
| yes               | 7 (53.9)                     | 61 (54.5)               |               | AIS             | 15 (53.6)                    | 13 (46.4)               |               |
| Malignancy        |                              |                         | 0.624         | MIA             | 16 (39.0)                    | 25 (61.0)               |               |
| no                | 50 (46.3)                    | 58 (53.7)               |               | ADC             | 75 (41.0)                    | 108 (59.0)              |               |
| yes               | 1 (25.0)                     | 3 (75.0)                |               | Other           | 1 (33.3)                     | 2 (66.7)                |               |
| Family malignancy |                              |                         | 0.308         | Diameter        |                              |                         | 0.326         |
| no                | 46 (47.4)                    | 51 (52.6)               |               | ≤1cm            | 71 (43.8)                    | 91 (56.2)               |               |
| yes               | 5 (33.3)                     | 10 (66.7)               |               | 1<X≤2cm         | 30 (41.7)                    | 42 (58.3)               |               |
| Highest T stage   |                              |                         | <b>0.027*</b> | >2cm            | 6 (28.6)                     | 15 (71.4)               |               |
| T1a               | 18 (56.3)                    | 14 (43.8)               |               | T stage         |                              |                         | <b>0.038*</b> |
| T1b               | 21 (51.2)                    | 20 (48.8)               |               | T1a             | 69 (46.3)                    | 60 (53.7)               |               |
| ≥T1c              | 12 (30.8)                    | 27 (69.2)               |               | T1b             | 25 (43.9)                    | 32 (56.1)               |               |
| Highest N stage   |                              |                         | 0.591         | ≥T1c            | 13 (26.5)                    | 36 (73.5)               |               |
| N0                | 49 (45.0)                    | 60 (55.0)               |               | N stage         |                              |                         | 0.574         |
| N1                | 2 (66.7)                     | 1 (33.3)                |               | N0              | 105 (41.7)                   | 147 (58.3)              |               |
| Highest TNM stage |                              |                         | <b>0.039*</b> | N1              | 2 (66.7)                     | 1 (33.3)                |               |
| IA1               | 18 (56.3)                    | 14 (43.7)               |               | TNM stage       |                              |                         | <b>0.044*</b> |
| IA2               | 20 (50.0)                    | 20 (50.0)               |               | IA1             | 69 (46.3)                    | 80 (53.7)               |               |
| ≥IA3              | 13 (32.5)                    | 27 (67.5)               |               | IA2             | 24 (42.9)                    | 32 (57.1)               |               |
|                   |                              |                         |               | ≥IA3            | 14 (28.0)                    | 36 (72.0)               |               |

**Table S4 Clinicopathological, radiological, and molecular characteristics of 25 MPLCs patients sharing the same driver mutation among at least 2 lesions**

| ID | Sex    | Age | Lesion, n | Tumor location | Tumors sharing mutation | Histopathology, radiology,   | Shared mutation         | Specific mutations, n |
|----|--------|-----|-----------|----------------|-------------------------|------------------------------|-------------------------|-----------------------|
| 2  | male   | 58  | 4         | bilateral      | 2A,<br>2D               | 2A: ADC, GGO<br>2D: AIS, GGO | EGFR p.L858R            | 2A: 8<br>2D: 0        |
| 4  | female | 57  | 2         | ipsilateral    | 4A,<br>4B               | ADC, GGO                     | EGFR p.L858R            | 4A: 4<br>4B: 1        |
| 5  | male   | 79  | 2         | lobe           | 5A,<br>5B               | ADC, GGO                     | KRAS p.G12C             | 5A: 8<br>5B: 10       |
| 21 | female | 43  | 4         | ipsilateral    | 21A,<br>21D             | ADC, GGO                     | ERBB2<br>p.Y772_A775dup | 21A: 3<br>21D: 1      |
| 23 | male   | 65  | 2         | bilateral      | 23A,                    | 23A: ADC, GGO                | EGFR p.L858R            | 23A: 3                |

|     |        |    |   |             |                     |                                                 |                                             |                            |
|-----|--------|----|---|-------------|---------------------|-------------------------------------------------|---------------------------------------------|----------------------------|
|     |        |    |   |             | 23B                 | 23B: MIA, GGO                                   |                                             | 23B: 4                     |
| 27  | female | 65 | 4 | bilateral   | 27B,<br>27C         | 27B: AIS, GGO<br>27C: AIS, GGO                  | EGFR p.L858R                                | 27B: 1<br>27C: 4           |
| 35  | female | 65 | 3 | ipsilateral | 35A,<br>35B         | 35A: ADC, GGO<br>35B: ADC, solid                | EGFR p.L858R                                | 35A: 9<br>35B: 0           |
| 39  | female | 36 | 4 | bilateral   | 39A,<br>39C         | ADC, GGO                                        | EGFR<br>p.A767_V769dup                      | 39A: 3<br>39C: 0           |
| 41  | female | 73 | 4 | bilateral   | 41C,<br>41D         | 41C: ADC, GGO<br>41D: ADC, GGO                  | EGFR p.L861Q<br>TNFRSF14<br>p.S186_W187insR | 41C: 3<br>41D: 5           |
| 50  | male   | 55 | 2 | lobe        | 50A,<br>50B         | 50A: ADC, GGO<br>50B: ADC, solid                | EGFR 19del                                  | 50A: 2<br>50B: 2           |
| 61  | female | 57 | 2 | bilateral   | 61A,<br>61B         | 61A: MIA, GGO<br>61B: ADC, GGO                  | EGFR 19del                                  | 61A: 2<br>61B: 2           |
| 66  | male   | 44 | 2 | ipsilateral | 66A,<br>66B         | ADC, GGO                                        | ERBB2<br>p.Y772_A775dup                     | 0                          |
| 68  | female | 59 | 3 | bilateral   | 68B,<br>68C         | 68B: ADC, solid<br>68C: ADC, GGO                | EGFR p.L858R                                | 68B: 2<br>68C: 0           |
| 69  | female | 52 | 2 | bilateral   | 69A,<br>69B         | 69A: ADC, GGO<br>69B: MIA, GGO                  | EGFR p.L858R                                | 69A: 3<br>69B: 2           |
| 76  | female | 56 | 3 | ipsilateral | 76A,<br>76B,<br>76C | 76A: ADC, GGO<br>76B: ADC, GGO<br>76C: MIA, GGO | BRAF p.K601E                                | 76A: 1<br>76B: 6<br>76C: 3 |
| 77  | male   | 37 | 2 | ipsilateral | 77A,<br>77B         | MIA, GGO                                        | ERBB2<br>p.Y772_A775dup                     | 0                          |
| 80  | female | 57 | 3 | lobe        | 80A,<br>80C         | ADC, GGO                                        | EGFR p.L858R                                | 80A: 5<br>80C: 3           |
| 81  | male   | 47 | 4 | ipsilateral | 81B,<br>81C,<br>81D | ADC, GGO                                        | EGFR 19del                                  | 81B: 3<br>81C: 4<br>81D: 4 |
| 91  | female | 59 | 2 | bilateral   | 91A,<br>91B         | 91A: ADC, solid<br>91B: ADC, GGO                | EGFR p.L858R                                | 91A: 10<br>91B: 5          |
| 92  | female | 57 | 3 | bilateral   | 92A,<br>92C         | ADC, GGO                                        | EGFR p.L858R                                | 92A: 5<br>92C: 3           |
| 98  | female | 58 | 2 | ipsilateral | 98A,<br>98B         | 98A: ADC, solid<br>98B: ADC, GGO                | EGFR p.L858R                                | 98A: 10<br>98B: 4          |
| 108 | female | 76 | 2 | lobe        | 108A,<br>108B       | ADC, GGO                                        | EGFR p.L858R<br>KRAS p.G12R                 | 108A: 1<br>108B: 3         |
| 111 | male   | 52 | 2 | bilateral   | 111A,<br>111B       | ADC, GGO                                        | EGFR 19delins                               | 111A: 5<br>111B: 1         |
| 112 | male   | 51 | 3 | lobe        | 112B,<br>112C       | 112B: ADC, GGO<br>112C: NEC, GGO                | KRAS p.G12V                                 | 112B: 21<br>112C: 32       |
| 114 | male   | 64 | 2 | ipsilateral | 114A,<br>114B       | ADC, GGO                                        | EGFR 19del                                  | 114A: 2<br>114B: 2         |

MPLCs: multiple primary lung cancers; GGO: ground-glass opacity; AIS: adenocarcinoma in situ; MIA: minimally invasive adenocarcinoma; ADC: adenocarcinoma; NEC: neuroendocrine tumors.

**Table S5 Association of PD-L1 and clinicopathological features and high-frequency mutated genes**

| Characteristics | PD-L1 TPS, n (%) |          | P value           | PD-L1 CPS, n (%) |           | P value       |
|-----------------|------------------|----------|-------------------|------------------|-----------|---------------|
|                 | <1%              | ≥1%      |                   | <1               | ≥1        |               |
| Tumor location  |                  |          | 0.507             |                  |           | 0.561         |
| Upper lobe      | 91 (94.8)        | 5 (5.2)  |                   | 42 (43.8)        | 54 (56.3) |               |
| Middle lobe     | 8 (100.0)        | 0 (0.0)  |                   | 4 (50.0)         | 4 (50.0)  |               |
| Lower lobe      | 52 (98.1)        | 1 (1.9)  |                   | 28 (52.8)        | 25 (47.2) |               |
| Radiology       |                  |          | <b>0.004*</b>     |                  |           | 0.771         |
| GGO             | 133 (98.5)       | 2 (1.5)  |                   | 63 (46.7)        | 72 (53.3) |               |
| Solid           | 18 (81.8)        | 4 (18.2) |                   | 11 (50.0)        | 11 (50.0) |               |
| Histopathology  |                  |          | <b>0.004*</b>     |                  |           | 0.882         |
| AIS             | 11 (100.0)       | 0 (0.0)  |                   | 6 (54.6)         | 5 (45.5)  |               |
| MIA             | 29 (100.0)       | 0 (0.0)  |                   | 15 (51.7)        | 14 (48.3) |               |
| ADC             | 110 (95.7)       | 5 (4.3)  |                   | 52 (45.2)        | 63 (54.8) |               |
| Other           | 1 (50.0)         | 1 (50.0) |                   | 1 (50.0)         | 1 (50.0)  |               |
| Diameter        |                  |          | <b>&lt;0.001*</b> |                  |           | 0.538         |
| ≤1cm            | 84 (97.7)        | 2 (2.3)  |                   | 44 (51.2)        | 42 (48.8) |               |
| ≤2cm            | 52 (100.0)       | 0 (0.0)  |                   | 22 (42.3)        | 30 (57.7) |               |
| >2 cm           | 15 (79.0)        | 4 (21.1) |                   | 8 (42.1)         | 11 (57.9) |               |
| pTNM stage      |                  |          | <b>0.010*</b>     |                  |           | 0.312         |
| IA1             | 72 (98.6)        | 1 (1.4)  |                   | 38 (52.1)        | 35 (48.0) |               |
| IA2             | 39 (100.0)       | 0 (0.0)  |                   | 19 (48.7)        | 20 (51.3) |               |
| ≥IA3            | 40 (88.9)        | 5 (11.1) |                   | 17 (37.8)        | 28 (62.2) |               |
| EGFR mutations  |                  |          | 0.631             |                  |           | 0.287         |
| no              | 48 (96.0)        | 2 (4.0)  |                   | 27 (54.0)        | 23 (46.0) |               |
| non-sensitive   | 25 (92.6)        | 2 (7.4)  |                   | 13 (48.1)        | 14 (51.9) |               |
| sensitive       | 64 (97.0)        | 2 (3.0)  |                   | 26 (39.4)        | 40 (60.6) |               |
| ERBB2 mutations |                  |          | 0.563             |                  |           | <b>0.046*</b> |
| no              | 124 (96.1)       | 5 (3.9)  |                   | 56 (43.3)        | 73 (56.6) |               |
| yes             | 13 (92.9)        | 1 (7.1)  |                   | 10 (71.4)        | 4 (28.6)  |               |
| TP53 mutations  |                  |          | 0.079             |                  |           | 0.461         |
| no              | 123 (96.9)       | 4 (3.1)  |                   | 60 (47.2)        | 67 (52.8) |               |
| yes             | 14 (87.5)        | 2 (12.5) |                   | 6 (37.5)         | 10 (62.5) |               |
| BRAF mutations  |                  |          | 0.563             |                  |           | 0.794         |
| no              | 124 (96.1)       | 5 (3.9)  |                   | 60 (46.5)        | 69 (53.5) |               |

|                  |            |          |               |           |           |
|------------------|------------|----------|---------------|-----------|-----------|
| yes              | 13 (92.9)  | 1 (7.1)  |               | 6 (42.9)  | 8 (57.1)  |
| RBM10 mutations  |            |          | 0.392         |           | 0.613     |
| no               | 122 (95.3) | 6 (4.7)  |               | 60 (46.9) | 68 (53.1) |
| yes              | 15 (100.0) | 0 (0.0)  |               | 6 (40.0)  | 9 (60.0)  |
| KRAS mutations   |            |          | 0.510         |           | 0.560     |
| no               | 125 (96.2) | 5 (3.8)  |               | 59 (45.4) | 71 (54.6) |
| yes              | 12 (92.3)  | 1 (7.7)  |               | 7 (53.8)  | 6 (46.2)  |
| MAP2K1 mutations |            |          | 0.600         |           | 1.000     |
| no               | 131 (95.6) | 6 (4.4)  |               | 63 (46.0) | 74 (54.0) |
| yes              | 6 (100.0)  | 0 (0.0)  |               | 3 (50.0)  | 3 (50.0)  |
| LRP1B mutations  |            |          | <b>0.001*</b> |           | 0.451     |
| no               | 132 (97.1) | 4 (2.9)  |               | 64 (47.1) | 72 (52.9) |
| yes              | 5 (71.4)   | 2 (28.6) |               | 2 (28.6)  | 5 (71.4)  |
| MED12 mutations  |            |          | 0.634         |           | 0.662     |
| no               | 132 (95.7) | 6 (4.3)  |               | 63 (45.7) | 75 (54.3) |
| yes              | 5 (100.0)  | 0 (0.0)  |               | 3 (60.0)  | 2 (40.0)  |
| PIK3CA mutations |            |          | 0.172         |           | 0.704     |
| no               | 131 (96.3) | 5 (3.7)  |               | 62 (45.6) | 74 (54.4) |
| yes              | 6 (85.7)   | 1 (14.3) |               | 4 (57.1)  | 3 (42.9)  |

PD-L1: programmed death ligand 1; TPS: tumor proportion score; CPS: combined positive score; GGO: ground-glass opacity; AIS: adenocarcinoma in situ; MIA: minimally invasive adenocarcinoma; ADC: adenocarcinoma.

**Table S6 Associations of TILs with clinicopathological characteristics**

| Characteristics | CD3-CT,<br>median (Q1-Q3) | P value           | CD3-IM,<br>median (Q1-Q3) | P value       | CD8-CT,<br>median (Q1-Q3) | P value           | CD8-IM,<br>median (Q1-Q3) | P value       |
|-----------------|---------------------------|-------------------|---------------------------|---------------|---------------------------|-------------------|---------------------------|---------------|
| Tumor location  |                           | 0.405             |                           | <b>0.041*</b> |                           | 0.759             |                           | 0.062         |
| Upper lobe      | 1508 (847-2283)           |                   | 550 (389-667)             |               | 513 (319-745)             |                   | 185 (131-297)             |               |
| Middle lobe     | 2103 (1398-3165)          |                   | 846 (759-959)             |               | 551 (406-1010)            |                   | 214 (169-672)             |               |
| Lower lobe      | 1601 (779-2329)           |                   | 552 (344-678)             |               | 530 (300-880)             |                   | 154 (113-269)             |               |
| Histopathology  |                           | 0.202             |                           | 0.583         |                           | 0.105             |                           | 0.811         |
| AIS             | 842 (654-2134)            |                   | 465 (385-664)             |               | 426 (255-476)             |                   | 186 (151-249)             |               |
| MIA             | 1522 (485-2038)           |                   | 552 (345-680)             |               | 384 (256-694)             |                   | 157 (131-264)             |               |
| ADC             | 1589 (973-2340)           |                   | 560 (368-725)             |               | 555 (325-782)             |                   | 170 (125-292)             |               |
| Diameter        |                           | <b>&lt;0.001*</b> |                           | <b>0.004*</b> |                           | <b>&lt;0.001*</b> |                           | <b>0.008*</b> |
| ≤1cm            | 1229 (619-1960)           |                   | 462 (334-648)             |               | 416 (255-694)             |                   | 151 (104-225)             |               |
| ≤2cm            | 1663 (1091-2335)          |                   | 568 (412-755)             |               | 557 (325-757)             |                   | 201 (156-303)             |               |
| >2cm            | 2385 (1747-2846)          |                   | 698 (553-1042)            |               | 813 (602-1427)            |                   | 192 (156-409)             |               |
| pTNM stage      |                           | <b>0.003*</b>     |                           | <b>0.035*</b> |                           | <b>0.006*</b>     |                           | <b>0.010*</b> |
| IA1             | 1043 (585-2037)           |                   | 512 (319-657)             |               | 413 (248-676)             |                   | 152 (104-234)             |               |
| IA2             | 1741 (1179-2334)          |                   | 571 (422-760)             |               | 540 (357-731)             |                   | 213 (157-317)             |               |
| ≥IA3            | 1705 (1187-2409)          |                   | 565 (368-889)             |               | 689 (384-850)             |                   | 172 (142-293)             |               |

TILs: tumor-infiltrating lymphocytes; CT: central tumor; IM: invasive margin; AIS: adenocarcinoma in situ; MIA: minimally invasive adenocarcinoma; ADC: adenocarcinoma.



**Table S7 Associations of TAMs with clinicopathological characteristics**

| Characteristics | CD68-CT,<br>median (Q1-Q3) | P value       | CD68-IM,<br>median (Q1-Q3) | P value | CD163-CT,<br>median (Q1-Q3) | P value       | CD163-IM,<br>median (Q1-Q3) | P value       |
|-----------------|----------------------------|---------------|----------------------------|---------|-----------------------------|---------------|-----------------------------|---------------|
| Tumor location  |                            | 0.466         |                            | 0.730   |                             |               |                             | 0.142         |
| Upper lobe      | 1110 (810-1424)            |               | 694 (564-900)              |         | 692 (536-878)               | 0.974         | 374 (266-508)               |               |
| Middle lobe     | 1346 (1192-1614)           |               | 722 (589-829)              |         | 773 (541-900)               |               | 474 (334-651)               |               |
| Lower lobe      | 1124 (887-1373)            |               | 776 (570-938)              |         | 702 (545-829)               |               | 417 (316-528)               |               |
| Histopathology  |                            | 0.093         |                            | 0.121   |                             |               |                             | 0.587         |
| AIS             | 881 (604-1299)             |               | 564 (392-890)              |         | 656 (483-874)               | 0.365         | 414 (237-547)               |               |
| MIA             | 1045 (733-1287)            |               | 756 (656-890)              |         | 682 (528-766)               |               | 337 (288-486)               |               |
| ADC             | 1152 (852-1448)            |               | 740 (568-913)              |         | 717 (543-879)               |               | 409 (298-521)               |               |
| Diameter        |                            | <b>0.003*</b> |                            | 0.064   |                             | <b>0.009*</b> |                             | <b>0.022*</b> |
| ≤1cm            | 1042 (732-1286)            |               | 687 (546-892)              |         | 677 (512-832)               |               | 374 (281-519)               |               |
| ≤2cm            | 1214 (892-1494)            |               | 740 (594-878)              |         | 719 (565-838)               |               | 392 (308-496)               |               |
| >2cm            | 1361 (1227-1691)           |               | 887 (675-1151)             |         | 879 (698-1200)              |               | 527 (411-633)               |               |
| pTNM stage      |                            | <b>0.002*</b> |                            | 0.434   |                             | <b>0.033*</b> |                             | 0.217         |
| IA1             | 1035 (710-1278)            |               | 687 (545-893)              |         | 671 (490-829)               |               | 395 (288-525)               |               |
| IA2             | 1198 (872-1425)            |               | 740 (591-910)              |         | 742 (540-838)               |               | 361 (260-497)               |               |
| ≥IA3            | 1329 (995-1622)            |               | 776 (605-944)              |         | 734 (607-961)               |               | 417 (332-557)               |               |

TAMs: tumor-associated macrophages; CT: central tumor; IM: invasive margin; AIS: adenocarcinoma in situ; MIA: minimally invasive adenocarcinoma; ADC: adenocarcinoma.

**Table S8 P values of non-parametric tests between immune indexes and frequent mutations**

|                  | CD3-CT        | CD3-IM        | CD8-CT        | CD8-IM        | CD68-CT       | CD68-IM | CD163-CT      | CD163-IM |
|------------------|---------------|---------------|---------------|---------------|---------------|---------|---------------|----------|
| EGFR mutations   | <b>0.005*</b> | <b>0.001*</b> | 0.240         | 0.171         | 0.478         | 0.759   | 0.714         | 0.626    |
| ERBB2 mutations  | <b>0.040*</b> | <b>0.027*</b> | <b>0.061</b>  | <b>0.058</b>  | <b>0.016*</b> | 0.561   | 0.280         | 0.679    |
| TP53 mutations   | <b>0.043*</b> | 0.64          | <b>0.002*</b> | <b>0.015*</b> | 0.083         | 0.084   | 0.065         | 0.241    |
| BRAF mutations   | 0.123         | 0.071         | 0.356         | 0.603         | 0.288         | 0.582   | 0.211         | 0.302    |
| RBM10 mutations  | <b>0.030*</b> | <b>0.036*</b> | 0.271         | 0.774         | 0.056         | 0.937   | 0.273         | 0.483    |
| KRAS mutations   | 0.715         | 0.305         | 0.430         | 0.284         | 0.833         | 0.388   | 0.594         | 0.450    |
| MAP2K1 mutations | <b>0.007*</b> | 0.100         | <b>0.033*</b> | 0.233         | 0.229         | 0.368   | <b>0.017*</b> | 0.944    |
| LRP1B mutations  | 0.822         | 0.914         | 0.235         | 0.650         | 0.335         | 0.877   | 0.660         | 0.772    |
| MED12 mutations  | 0.705         | 0.921         | 0.135         | 0.058         | 0.448         | 0.144   | 0.524         | 0.195    |
| PIK3CA mutations | 0.948         | 0.197         | 0.881         | 0.885         | 0.372         | 0.892   | 0.996         | 0.647    |
| TMB              | 0.118         | <b>0.012*</b> | 0.075         | 0.249         | 0.131         | 0.564   | 0.650         | 0.513    |

CT: central tumor; IM: invasive margin; TMB: tumor mutation burden.

**Figure S1 Mutation subtypes of other genes.**

The frequency distribution of MAP2K1 (A), PIK3CA (B), ALK (C), ROS1 (D), and RET (E) mutation subtypes.

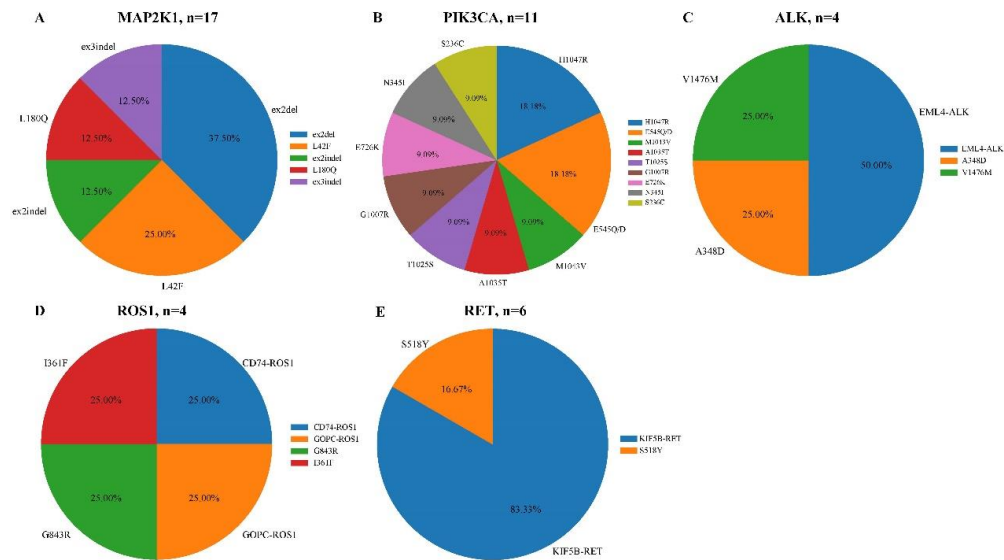

MPLCs: multiple primary lung cancers.

**Figure S2 Genomic profile and clinicopathological features of 61 MPLCs patients sharing at least one putative driver gene.**

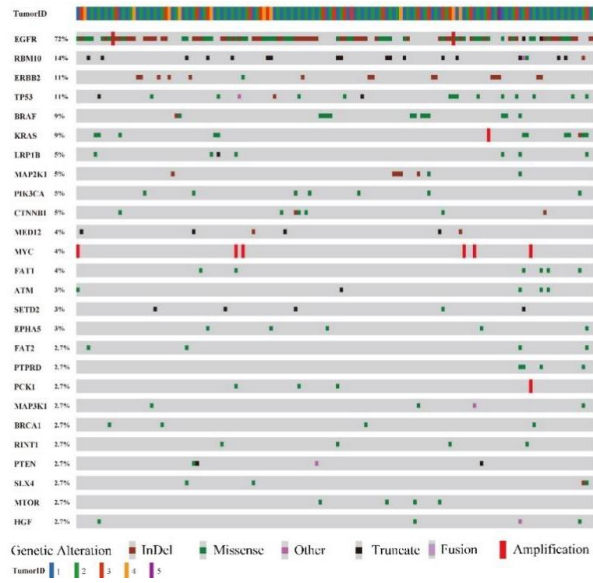

MPLCs: multiple primary lung cancers.

**Figure S3 Association of TMB with clinicopathological features.**

Association of TMB with tumor location (A), histology subtypes (B), T stages (C), and pTNM stages (D).

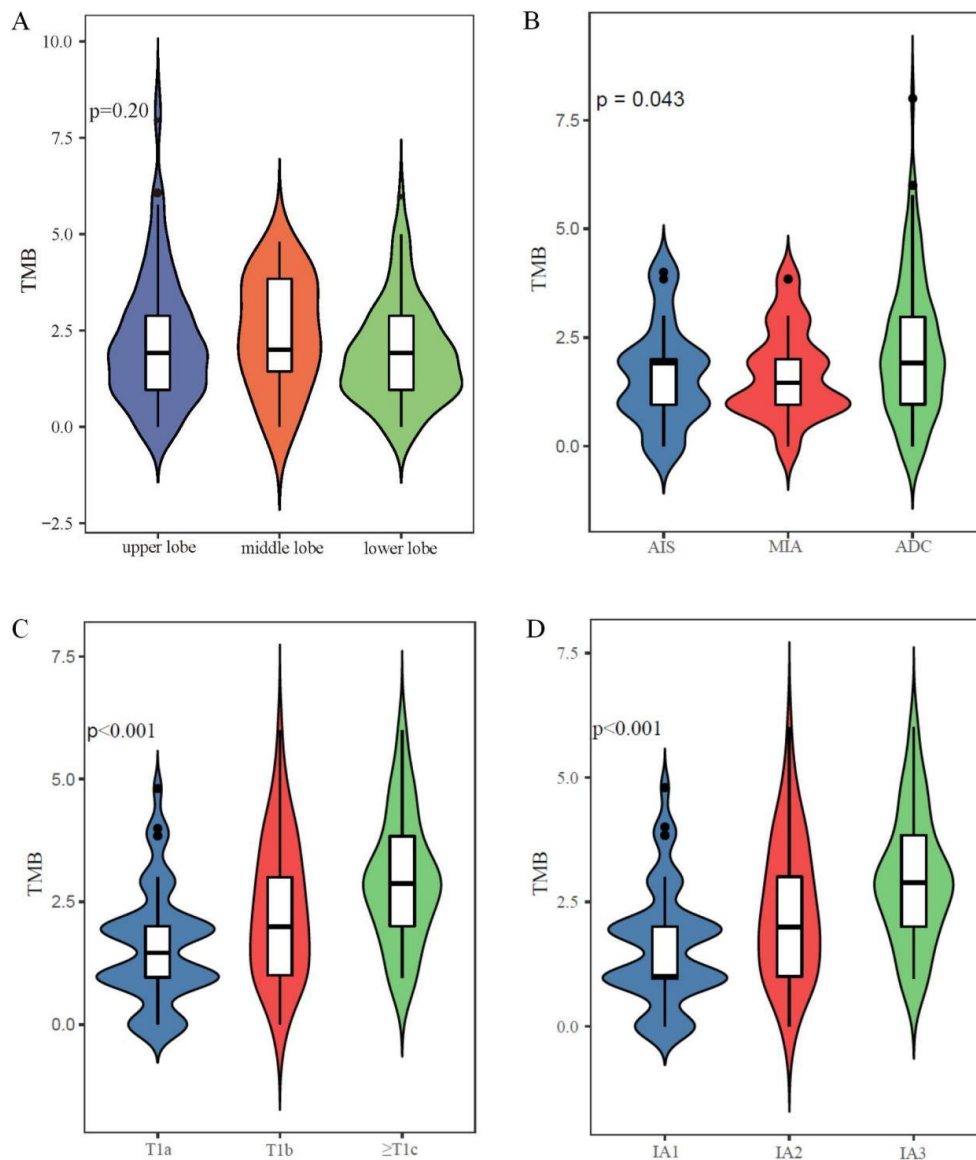

TMB: tumor mutation burden; AIS: adenocarcinoma in situ; MIA: minimally invasive adenocarcinoma; ADC: adenocarcinoma.

**Figure S4 Association of TMB with EGFR mutations in tumors without TP53/RBM10/LRP1B mutation.**

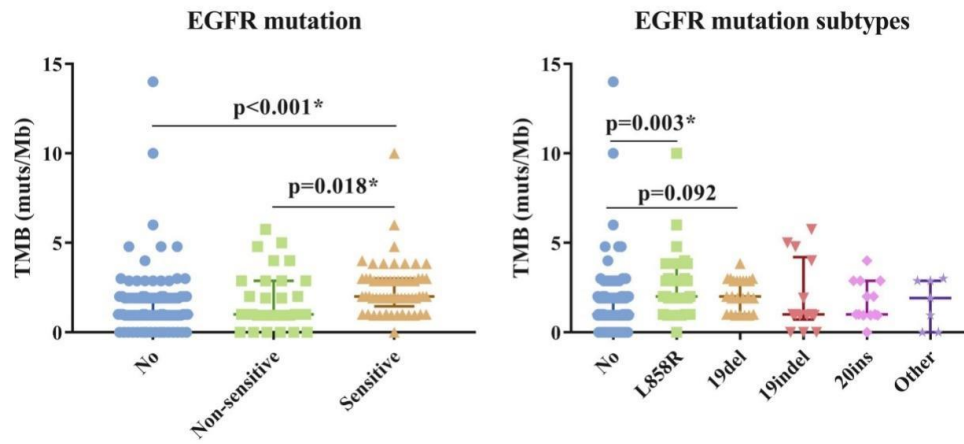

TMB: tumor mutation burden.

**Figure S5 The distribution and correlation analysis of tumor-infiltrating immune cells.**

(A) The distribution of CD3+/CD8+TILs and CD68+/CD163+TAMs at CT and IM. (B) Correlation analysis of immune indicators.

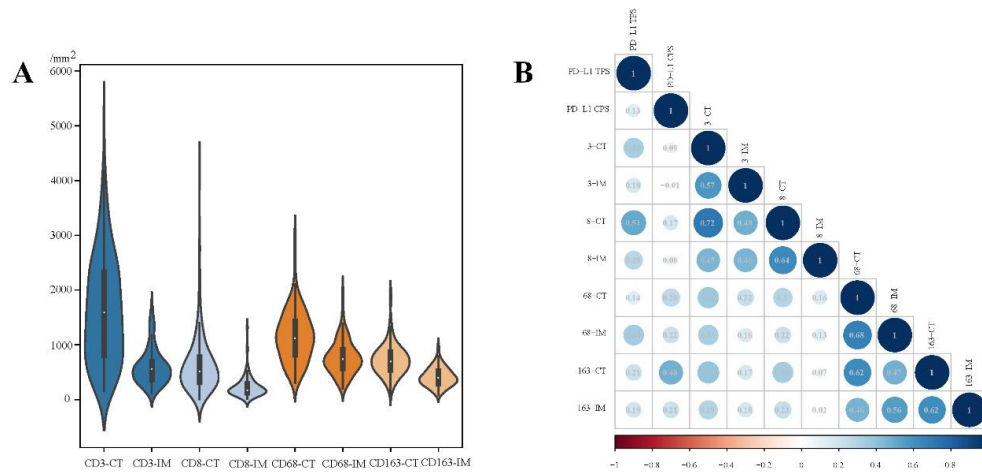

PD-L1: programmed death ligand 1; TPS: tumor proportion score; CPS: combined positive score; CT: central tumor; IM: invasive margin.

**Figure S6 Association of EGFR mutations with CD3+TILs in tumors with or without TP53/RBM10 mutation.**

(A) Association of EGFR mutation subtypes with CD3+TILs in 143 tumors. (B) Association of EGFR mutation and its subtypes with CD3+TILs in 112 tumors without TP53/RBM10 mutation.

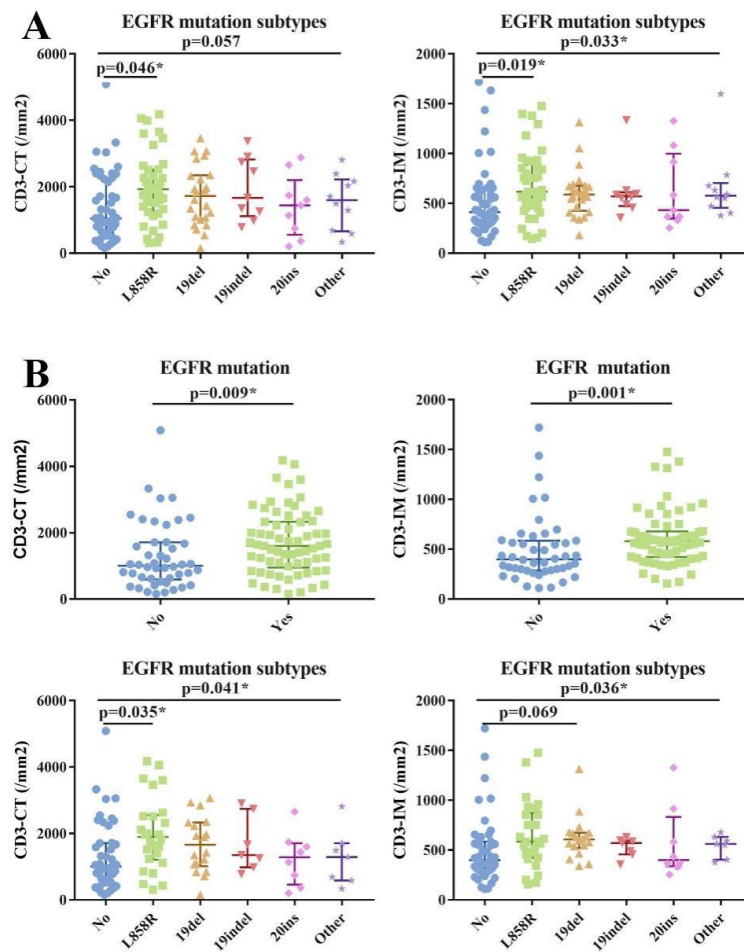

TILs: tumor-infiltrating lymphocytes; CT: central tumor; IM: invasive margin.



### **Methods S1. Sample Processing and DNA Extraction**

The genomic DNA (gDNA) in formalin-fixed, paraffin-embedded (FFPE) tissue samples and peripheral blood lymphocytes (PBL) was extracted by using the QIAamp DNA FFPE Tissue & Blood Mini Kit (Qiagen, Hilden, Germany). DNA concentrations in tissue samples was measured with a Qubit fluorometer and the Qubit dsDNA HS (High Sensitivity) Assay Kit (Invitrogen, Carlsbad, CA USA), while DNA concentrations in PBL was with the Qubit 3.0 fluorometer and the Qubit dsDNA HS (High Sensitivity) Assay Kit (Thermo Fisher Scientific Inc., Carlsbad, CA, USA).

### **Methods S2. Target Capture and Next-Generation Sequencing (NGS)**

The custom-designed biotinylated oligonucleotide probes (Roche NimbleGen, Madison, WI, USA) covering ~1.4 Mbp coding region of genomic sequence of 1021 cancer-related genes (supplementary table S1) was designed. For library construction, 1.0 µg of PBL and tissue DNA were sheared to 300-bp fragments with a Covaris S2 ultrasonicator (Covaris, Woburn, MA, USA). Libraries were constructed using the KAPA DNA Library Preparation Kit (Kapa Biosystems, Wilmington, MA, USA). Captured libraries were measured using an Agilent 2100 Bioanalyzer and an Applied Biosystems 7500 real-time PCR system (Thermo Fisher Scientific Inc., Carlsbad, CA, USA). DNA sequencing was carried out on the HiSeq3000 Sequencing System (Illumina, San Diego, CA, USA) with 2×100 bp paired-end reads.

### **Methods S3. Next-Generation Sequencing Analysis**

From raw sequencing data, terminal adaptor sequences and low-quality reads were removed. The reads were aligned to the human genome build GRCh37 using BWA (a Burrows-Wheeler aligner)<sup>1</sup>. To mark PCR duplicates, Picard tools (<http://broadinstitute.github.io/picard/>) were used. SNVs and Indels were called using MuTect (version 1.1.4)<sup>2</sup> and GATK (version 3.4-46-gbc02625)<sup>3</sup>, respectively. PBL sequencing results were used to filter germline variations. All candidate somatic mutations identified by the bioinformatics pipeline were manually reviewed in the

Integrative Genomics Viewer (IGV)<sup>4</sup> through assessing the quality of base calls, the mapping quality of the reads, and the overall read depth at each mutation site. Mutations were annotated to genes by ANNOVAR software<sup>5</sup> to identify the mutated protein-coding position and filtered intronic and silent changes. Variant allele fraction (VAF) = sequencing read count of altered alleles/(sequencing read count of reference alleles + sequencing read count of altered alleles) ×100%. For tissue, a mutation was identified according to these standards: VAF ≥ 1.0%, and at least 5 high-quality reads (Phred score ≥ 30, mapping quality ≥ 30, and without paired-end reads bias).

1. Li H, Durbin R. Fast and accurate short read alignment with Burrows-Wheeler transform. *Bioinformatics*. 2009;25(14):1754-1760.
2. Cibulskis K, Lawrence MS, Carter SL, et al. Sensitive detection of somatic point mutations in impure and heterogeneous cancer samples. *Nat Biotechnol*. 2013;31(3):213-219.
3. McKenna A, Hanna M, Banks E, et al. The Genome Analysis Toolkit: a MapReduce framework for analyzing next-generation DNA sequencing data. *Genome Res*. 2010;20(9):1297-1303.
4. Robinson JT, Thorvaldsdottir H, Winckler W, et al. Integrative genomics viewer. *Nat Biotechnol*. 2011;29(1):24-26.
5. Wang K, Li M, Hakonarson H. ANNOVAR: functional annotation of genetic variants from high-throughput sequencing data. *Nucleic Acids Res*. 2010;38(16):e164.
